# Supplementary material for: Assessing structure and stability of polymer/lithium-metal interfaces from first-principles calculations
Source: Royal Society of Chemistry journal article supplement (doi:10.1039/c8ta12147h), 2019-01-01
Supplement: c8ta12147h1.pdf [file c8ta12147h1.pdf]

## Supporting information

### Assessing Structure and Stability of Polymer/Lithium-Metal Interfaces from First-Principles Calculations

Mahsa Ebadi,<sup>a</sup> Cleber Marchiori,<sup>b</sup> Jonas Mindemark,<sup>a</sup> Daniel Brandell,<sup>a\*</sup> C. Moyses Araujo<sup>b\*</sup>

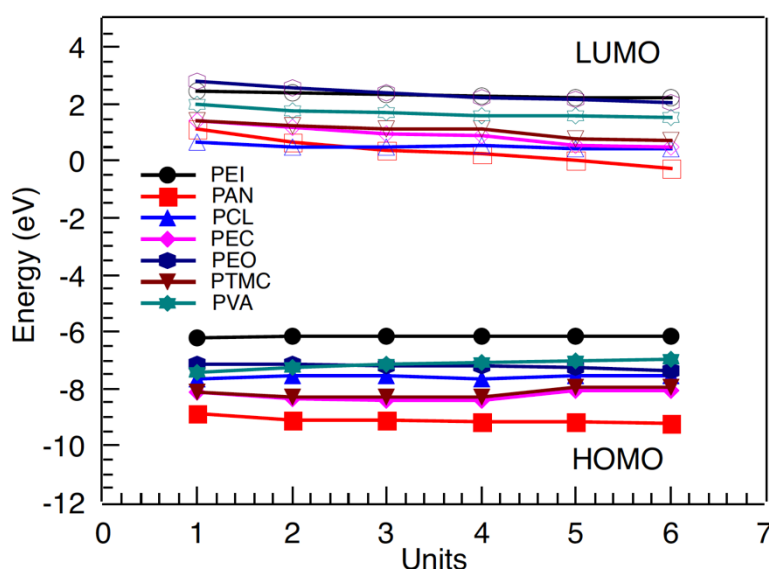

**Fig. S1.** Highest occupied molecular orbital (HOMO) and lowest unoccupied molecular orbital (LUMO) energies for different oligomers in the study with different number of repeating units.

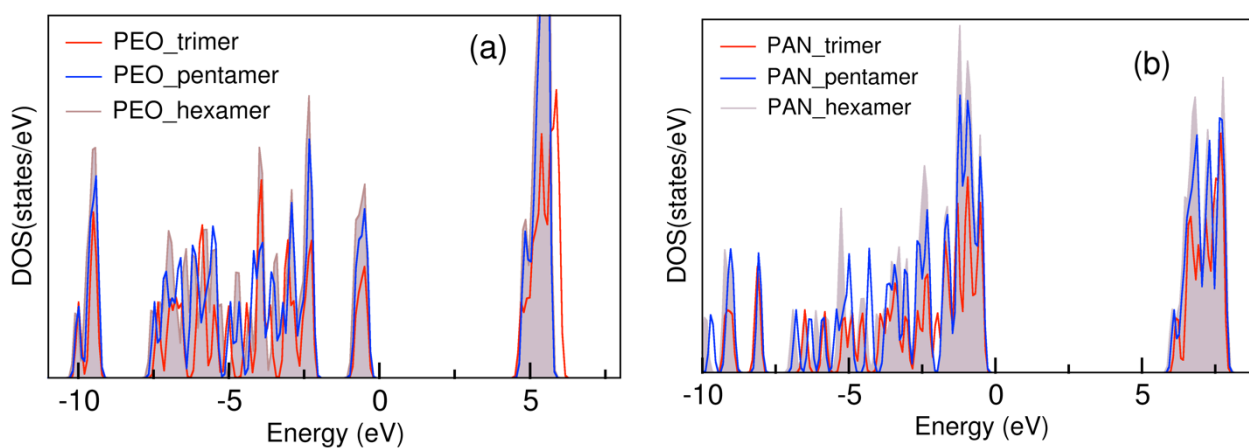

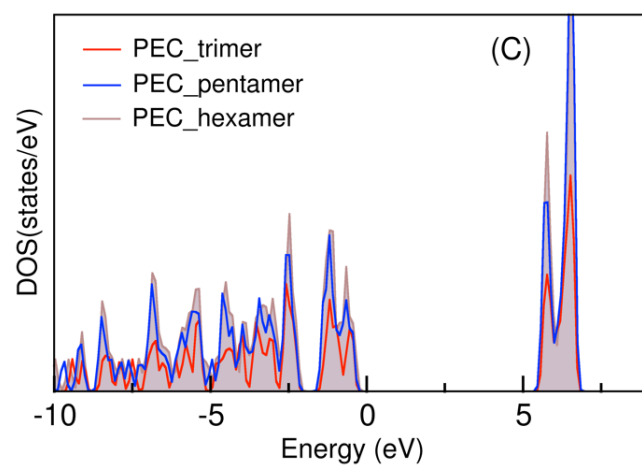

**Fig. S2.** Total density of states (DOS) of trimer, pentamer and hexamer of (a) PEO, (b) PAN, and (c) PEC.
